# Supplementary material for: Low HDL-cholesterol levels predict hepatocellular carcinoma development in individuals with liver fibrosis
Source: PubMed Central journal article supplement (PMC9763866; doi:10.1016/j.jhepr.2022.100627), 2022-11-15
Supplement: mmc1.pdf [file mmc1.pdf]

**Journal of Hepatology, Volume 5**

**Supplemental information**

**Low HDL-cholesterol levels predict hepatocellular carcinoma development in individuals with liver fibrosis**

**Lucilla Crudele, Carlo De Matteis, Elena Piccinin, Raffaella Maria Gadaleta, Marica Cariello, Ersilia Di Buduo, Giuseppina Piazzolla, Patrizia Suppressa, Elsa Berardi, Carlo Sabbà, and Antonio Moschetta**

**Low HDL-cholesterol levels predict hepatocellular carcinoma  
development in individuals with liver fibrosis**

Lucilla Crudele, Carlo De Matteis, Elena Piccinin, Raffaella Maria Gadaleta, Marica  
Cariello, Ersilia Di Buduo, Giuseppina Piazzolla, Patrizia Suppressa, Elsa Berardi, Carlo  
Sabbà, Antonio Moschetta

Table of content

Table S1.....2

**Table S1. Child-Pugh and Meld Scores in patients who developed HCC.**

| <b>Patient ID</b> | <b>Child-Pugh</b> | <b>Meld Score-Na</b> |
|-------------------|-------------------|----------------------|
| 1                 | 6                 | 13                   |
| 2                 | 5                 | 8                    |
| 3                 | 6                 | 9                    |
| 4                 | 5                 | 7                    |
| 5                 | 6                 | 11                   |
| 6                 | 8                 | 10                   |
| 7                 | 5                 | 9                    |
| 8                 | 5                 | 9                    |
| 9                 | 5                 | 9                    |
| 10                | 5                 | 7                    |
| 11                | 6                 | 11                   |
| 12                | 6                 | 9                    |
| 13                | 7                 | 7                    |
| 14                | 7                 | 8                    |
| 15                | 6                 | 7                    |
| 16                | 5                 | 7                    |
| <b>Mean±SD</b>    | <b>5.81±0.88</b>  | <b>8.81±1.70</b>     |
